# Energy efficient synaptic plasticity

Ho Ling Li<sup>1</sup> and Mark C. W. van Rossum<sup>1,2,\*</sup>

Wednesday 24<sup>th</sup> July, 2019

<sup>1</sup>School of Psychology, <sup>2</sup>School of Mathematical Sciences,  
University of Nottingham, Nottingham NG7 2RD, U.K.

\*Corresponding author. E-mail: mark.vanrossum@nottingham.ac.uk

## Abstract

Many aspects of the brain's design can be understood as the result of evolutionary drive towards efficient use of metabolic energy. In addition to the energetic costs of neural computation and transmission, experimental evidence indicates that synaptic plasticity is metabolically demanding as well. As synaptic plasticity is crucial for learning, we examine how these metabolic costs enter in learning. We find that when synaptic plasticity rules are naively implemented, training neural networks requires extremely large amounts of energy when storing many patterns. We propose that this is avoided by precisely balancing labile forms of synaptic plasticity with more stable forms. This algorithm, termed synaptic caching, boosts energy efficiency manifold. Our results yield a novel interpretation of the multiple forms of neural synaptic plasticity observed experimentally, including synaptic tagging and capture phenomena. Furthermore our results are relevant for energy efficient neuromorphic designs.

1 The human brain only weighs 2% of the total body mass, but is responsible for 20% of resting  
2 metabolism [1, 2]. The brain's energy need is believed to have shaped many aspects of its design,  
3 such as its sparse coding strategy [3, 4], the biophysics of the mammalian action potential [5, 6],  
4 and synaptic failure [7, 2]. As the connections in the brain are adaptive, one can design synaptic  
5 plasticity rules that further reduce the energy required for information transmission, for instance  
6 by sparsifying connectivity [8]. But in addition to the costs associated to neural information  
7 processing, experimental evidence suggests that memory formation, presumably corresponding  
8 to synaptic plasticity, is itself an energetically expensive process as well [9, 10, 11, 12].

9 To estimate the amount of energy required for plasticity, Mery and Kawecki [9] subjected fruit  
10 flies to associative conditioning spaced out in time, resulting in long-term memory formation.  
11 After training, the fly's food supply was cut off. Flies exposed to the conditioning died some  
12 20% quicker than control flies. Similarly, fruit flies doubled their sucrose consumption during  
13 the formation of aversive long-term memory [12], while forcing starving fruit flies to form such  
14 memories reduced lifespan by 30% [10]. Notably, less permanent forms of learning that don't  
15 require protein synthesis have been observed to be energetically less costly [9, 10].

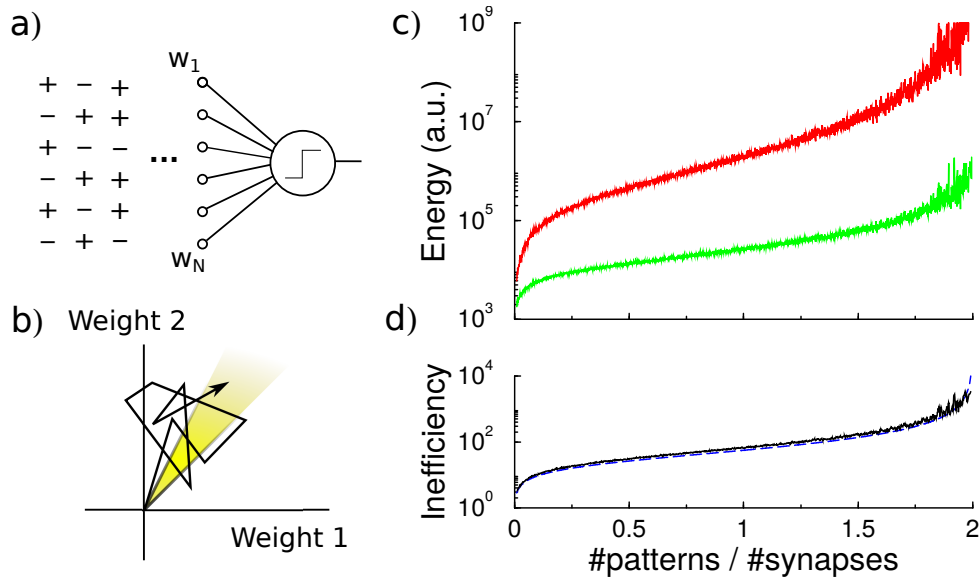

Figure 1: **Energy efficiency of perceptron learning** (a) A perceptron cycles through the patterns and updates its synaptic weights until all patterns produce their correct target output. (b) During learning the synaptic weights follow approximately a random walk until they find the solution (yellow region). The energy consumed by the learning corresponds to the total length of the path (under the  $L_1$  norm). (c) The energy required to train the perceptron diverges when storing many patterns (red curve). The minimal energy required to reach the correct weight configuration is shown for comparison (green curve). (d) The inefficiency, defined as the ratio between actual and minimal energy plotted in panel c, diverges as well (black curve). The overlapping blue curve corresponds to Eq. 3 in the text.

16 Motivated by these experimental results, we analyze the metabolic energy required to form  
17 associative memories in neuronal networks. We demonstrate that traditional learning algorithms  
18 are metabolically highly inefficient. Therefore we introduce a synaptic caching algorithm that  
19 is consistent with synaptic consolidation experiments, and distributes learning over transient  
20 and persistent synaptic changes. This algorithm increases efficiency manifold. Synaptic caching  
21 yields a novel interpretation to various aspects of synaptic physiology, and suggests more energy  
22 efficient neuromorphic designs.

## 23 Results

24 To examine the metabolic energy cost associated to synaptic plasticity, we first study the  
25 perceptron. A perceptron is a single artificial neuron that attempts to binary classify input  
26 patterns. It forms the core of many artificial networks and has been used to model plasticity in  
27 cerebellar Purkinje cells. We consider the common case where the input patterns are random  
28 patterns each associated to a randomly chosen binary output. Upon presentation of a pattern,  
29 the perceptron output is calculated and compared to the desired output. The synaptic weights  
30 are modified according to the perceptron learning rule, Fig. 1A. This is repeated until all patterns  
31 are classified correctly [13, see Methods]. Typically, the learning takes multiple iterations over  
32 the whole dataset ('epochs').

33 As it is not well known how much metabolic energy is required to modify a biological synapse,

34 and how this depends on the amount of change and the sign of the change, we propose a  
35 parsimonious model. We assume that the metabolic energy for every modification of a synaptic  
36 weight is proportional to the amount of change, no matter if this is positive or negative, although  
37 there is evidence that synaptic depression involves different pathways than synaptic potentiation,  
38 see e.g. [14]. The total metabolic cost  $M$  (in arbitrary units) to train a perceptron is

$$M_{\text{perc}} = \sum_{i=1}^N \sum_{t=1}^T |w_i(t) - w_i(t-1)|^\alpha \quad (1)$$

39 where  $N$  is the number of synapses,  $w_i$  denotes the synaptic weight at synapse  $i$ , and  $T$  is the  
40 total number of time-steps required to learn the classification. The exponent  $\alpha$  is set to one, but  
41 our results below are similar whenever  $0 \leq \alpha \lesssim 2$ .

42 Learning can be understood as a search in the space of synaptic weights for a weight vector  
43 that leads to correct classification of all patterns, Fig. 1B. The synaptic weights approximately  
44 follow a random walk (Methods), and the energy is proportional to the length of this walk under  
45 the  $L_1$  norm, Eq. 1. The perceptron learning rule is energy inefficient, because repeatedly, weight  
46 modifications made to correctly classify one pattern are partly undone when learning another  
47 pattern, but as both processes require energy this is inefficient.

48 The energy required by the perceptron learning rule depends on the number of patterns  $P$   
49 to be classified. The set of correct weights spans a cone in  $N$ -dimensional space (yellow region  
50 in Fig. 1B). As the number of patterns to be classified increases, the cone containing correct  
51 weights shrinks and the random walk becomes longer [15]. Near the critical capacity of the  
52 perceptron ( $P = 2N$ ), the number of epochs required diverges as  $(2 - P/N)^{-2}$ , [16]. The energy  
53 required, which is proportional to the number of updates that the weights undergo, follows a  
54 similar behavior, Fig. 1C.

55 It is useful to consider the theoretical minimal energy required to classify all patterns. The  
56 most energy efficient algorithm would somehow directly set the synaptic weights to their desired  
57 final values. Geometrically, the random walk trajectory of the synaptic weights to the target is  
58 replaced by a path straight to the correct weights. Given the initial weights  $w_i(0)$  and the final  
59 weights  $w_i(T)$ , the energy required in this idealized case to set the synapses correctly is

$$M_{\text{min}} = \sum_i |w_i(T) - w_i(0)|. \quad (2)$$

60 While the minimal energy also grows with the memory load (Methods), it increases less steeply,  
61 Fig. 1C.

62 We express the metabolic efficiency of a learning algorithm as the ratio between the energy  
63 the algorithm requires and the minimal energy (the gap between the two curves in Fig. 1C). As  
64 the number of patterns increases, the inefficiency of the perceptron rule rapidly grows, Fig. 1D,  
65 as (see Methods)

$$\frac{M_{\text{perc}}}{M_{\text{min}}} = \frac{\sqrt{\pi P}}{2 - P/N}, \quad (3)$$

66 which fits the simulations well.

67 There is evidence that both cerebellar and cortical neurons are operating close to their

68 maximal memory capacity [17, 18]. Indeed, it would appear wasteful if this were not the case.  
69 However, the above result demonstrates that for instance classifying 1900 patterns by a neuron  
70 with 1000 synapses with the traditional perceptron learning requires about  $\sim 900$  times more  
71 energy than minimally required. As the fruit-fly experiments indicate that even storing a single  
72 association in long-term memory is already metabolically expensive, storing many memories  
73 would thus require very large amounts of energy if the biology would naively implement these  
74 learning rules.

## 75 Synaptic caching

76 How can the conflicting demands of energy efficiency and high storage capacity be met? The  
77 minimal energy argument presented above suggests a way to increase energy efficiency. There  
78 are forms of plasticity - anaesthesia resistant memory in flies and early-LTP/LTD in mammals -  
79 that decay and do not require protein synthesis. Such transient synaptic changes can be induced  
80 using a massed, instead of a spaced, stimulus presentation protocol. Fruit-fly experiments show  
81 that this form of plasticity is much less energy-demanding than long-term memory [9, 10, 12]. In  
82 mammals there is evidence that synaptic consolidation, but not transient plasticity, is suppressed  
83 under low energy conditions [19]. Inspired by these findings we propose that the transient form of  
84 plasticity constitutes a synaptic variable that accumulates the synaptic changes across multiple  
85 updates in a less expensive form of memory; only occasionally the changes are consolidated. We  
86 call this *synaptic caching*.

87 Specifically, we assume that each synapse is comprised of a transient component  $s_i$  and a  
88 persistent component  $l_i$ . The total synaptic weight is their sum,  $w_i = s_i + l_i$ . We implement  
89 synaptic caching as follows, Fig. 2A: For every presented pattern, changes in the synaptic strength  
90 are calculated according to the perceptron rule and are accumulated in the transient component  
91 that decays exponentially to zero. If, however, the absolute value of the transient component of  
92 a synapse exceeds a certain consolidation threshold, all synapses of that neuron are consolidated  
93 (vertical dashed line in Fig. 2A), the value of the transient component is added to the persistent  
94 weight, and the transient weight is reset to zero.

95 How much efficiency can be improved with synaptic caching depends on the limitations of  
96 transient plasticity. If the transient synaptic component could store information indefinitely at no  
97 metabolic cost, consolidation could be postponed until the end of learning and the energy would  
98 equal the minimal energy Eq. 2. Hence the efficiency gain would be maximal. However, we assume  
99 that the efficiency gain of synaptic caching is limited because of two effects: 1) The transient  
100 component decays exponentially (with a time-constant  $\tau$ ). 2) There might be a maintenance  
101 cost associated to maintaining the transient component. Biophysically, transient plasticity might  
102 correspond to an increased/decreased vesicle release rate [20, 21] so that it diverges from its  
103 optimal value [7].

104 To estimate the energy saved by synaptic caching we assume that the maintenance cost is  
105 proportional to the transient weight itself and incurred every time-step  $\Delta t$  (shaded area in the  
106 top traces of Fig. 2A)

$$M_{\text{trans}} = c \sum_i \sum_t |s_i(t)|$$

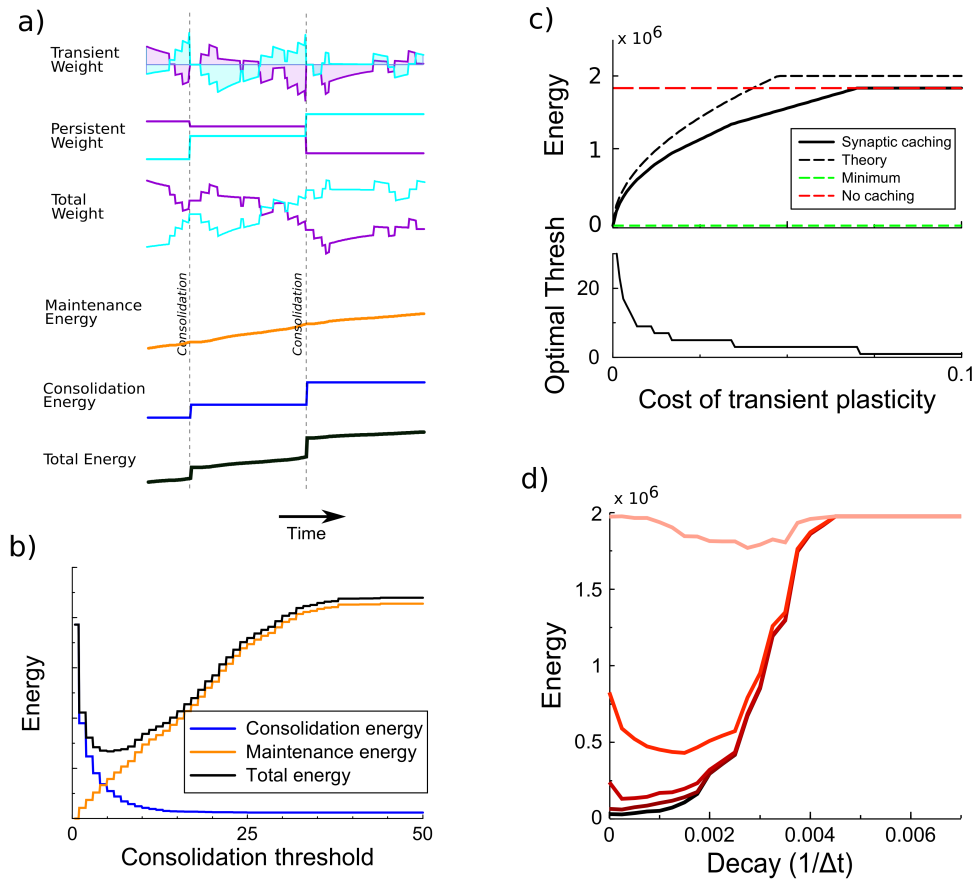

Figure 2: **Synaptic caching algorithm** (a) Changes in the synaptic weights are initially stored in metabolically cheaper transient decaying weights. Here two example weight traces are shown (blue and magenta). The total synaptic weight is composed of transient and persistent forms. Whenever any of the transient weights exceed the consolidation threshold, the weights become persistent and the transient values are reset (vertical dashed line). The corresponding energy consumed during the learning process consists of two terms: the energy cost of maintenance is assumed to be equal to the magnitude of the transient weight (shaded area in top traces); energy cost for consolidation is incurred at consolidation events. (b) The total energy is composed of the energy to occasionally consolidate and the energy to support transient plasticity. Here it is minimal for an intermediate consolidation threshold. (c) The amount of energy required for learning with synaptic caching, in the absence of decay of the transient weights (black curve). When there is no decay and no maintenance cost the energy equals the minimal one (green line) and the efficiency gain is maximal. As the maintenance cost increases, the optimal consolidation threshold decreases (lower panel) and the total energy required increases, until no efficiency is gained at all by synaptic caching. (d) The amount of energy required for learning as a function of the decay of transient plasticity for various values of the maintenance cost (from bottom to top maintenance cost  $c = 0, 10^{-4}, 10^{-3}, 10^{-2}, 10^{-1}$ ). Broadly, stronger decay will increase the energy required and hence reduce efficiency.

107 While experiments indicate that transient plasticity is metabolically far less demanding than the  
108 persistent form, the precise value of the maintenance cost is not known. We encode it in the  
109 constant  $c$ ; the theory also includes the case that  $c$  is zero.

110 Next we need to include the energetic cost of consolidation. Currently it is unknown how  
111 different components of synaptic consolidation, such as signaling, protein synthesis, transport  
112 to the synapses and changing the synapse, contribute to this cost. We assume the metabolic  
113 cost to consolidate the synaptic weights is  $M_{\text{cons}} = \sum_i \sum_t |l_i(t) - l_i(t-1)|$ . The form of the  
114 consolidation energy is identical to Eq. 1, but in contrast to the standard perceptron learning,  
115 where synapses are consolidated every time a weight is updated, now changes in the persistent  
116 component  $l_i$  only occur when consolidation occurs. One can add a term similar to a one-off cost  
117 for changing the transient component, but as that would not vary with consolidation rate it is  
118 not included.

119 The energy gain achieved by synaptic caching depends on the consolidation threshold, Fig. 2B.  
120 When the threshold is low, consolidation occurs often and the energy approaches the one without  
121 synaptic caching. When on the other hand the consolidation threshold is high, the expensive  
122 consolidation process occurs rarely, but the maintenance cost of transient plasticity is high,  
123 moreover the decay will lead to forgetting of unconsolidated memories, slowing down learning and  
124 increasing the energy cost. Thus the consolidation energy decreases for larger thresholds, whereas  
125 the maintenance energy increases, Fig. 2B (see Methods). As a result of this trade-off there  
126 is an optimal threshold, which depends on the decay and the maintenance cost, that balances  
127 persistent and transient forms of plasticity. To analyze the efficiency gain we use this optimal  
128 value.

129 Fig. 2C shows the energy required to train the perceptron for the case when the transient  
130 component does not decay. When the maintenance cost is absent ( $c = 0$ ), consolidation is best  
131 postponed until the end of the learning and the energy is as low as the theoretical minimal  
132 bound. As  $c$  increases, it becomes beneficial to consolidate more often, i.e. the optimal threshold  
133 decreases, Fig. 2C bottom panel. The required energy increases until the maintenance cost  
134 becomes so high that it is better to consolidate after every update and no energy is saved with  
135 synaptic caching. The efficiency is well described by analysis, Fig. 2C (Methods).

136 Fig. 2D examines the amount of savings as a function of the strength of the decay (expressed  
137 as  $1/\tau$ ) of the transient component for various levels of maintenance cost. Efficiency is high  
138 when there is no decay. However, if the transient component decays it is best to consolidate  
139 more frequently, even when the maintenance cost is zero, as otherwise, information is lost and  
140 learning time increases. Interestingly, with intermediate amounts of decay somewhat less energy  
141 is required than without any decay. The reason is a slight reduction on number of epochs required  
142 when the synaptic weights decay.

143 In the above implementation of synaptic caching, consolidation of all synapses was triggered  
144 when transient plasticity at a single synapse exceeded a certain threshold. This resembles the  
145 synaptic tagging and capture phenomenon where plasticity induction leads to transient changes  
146 and sets a tag; only strong enough stimulation results in proteins being synthesized and being  
147 delivered to all tagged synapses, consolidating the changes [22, 23]. There are a number of  
148 alternative ways to model the interaction between synapses: the threshold could be synapse-

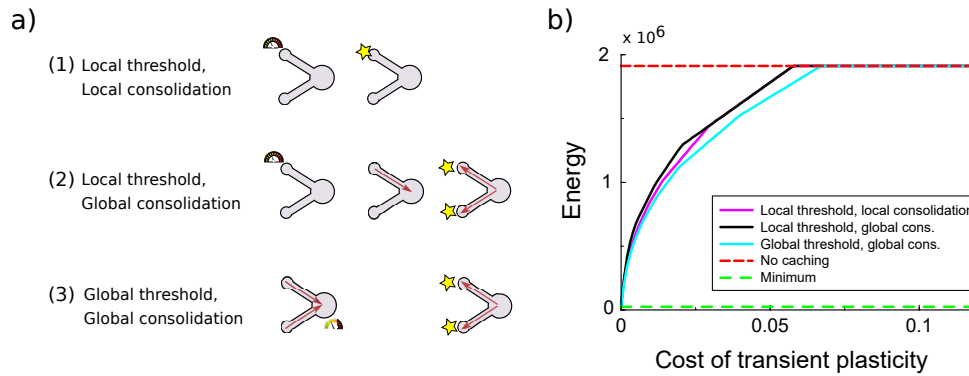

Figure 3: **Comparison of various variants of the synaptic caching algorithm** (a) Schematic representation of variants to decide when consolidation occurs. From top to bottom: 1) Consolidation (indicated by the star) occurs whenever transient plasticity at a synapse crosses the consolidation threshold and only that synapse is consolidated. 2) Consolidation of all synapses occurs once transient plasticity at any synapse crosses the threshold. 3) Consolidation of all synapses occurs once the total transient plasticity across synapses crosses the threshold. (b) Energy required to teach the perceptron is comparable across algorithm variants. Consolidation thresholds were optimized for each algorithm and each maintenance cost of transient plasticity individually. In this simulation the transient plasticity did not decay.

149 specific or neuron-wide, and the consolidation could be synapse-specific or neuron-wide, Fig. 3A.  
150 In practice there are three possibilities: First, consolidation might be set to occur whenever  
151 transient plasticity at a synapse crosses the threshold and only that synapse is consolidated.  
152 Second, a hypothetical signal might send to the soma and consolidation of all synapses occurs  
153 once transient plasticity at any synapse crosses the threshold (used in Figs. 2 and 4). Thirdly, a  
154 hypothetical signal might be accumulated in or near the soma and consolidation of all synapses  
155 occurs once this total transient plasticity across synapses crosses the threshold. Only cases 2  
156 and 3 are consistent with synaptic tagging and capture experiments, where consolidation of  
157 one synapse also leads to consolidation of another synapse that would otherwise decay back to  
158 baseline [22, 24]. Notably, all variants lead to comparable efficiency gains, Fig. 3B.

159 In summary we see that synaptic caching can in principle achieve large efficiency gains,  
160 bringing efficiency close to the theoretical minimum.

## 161 Energy of learning in multi-layer network

162 Since the perceptron is a rather restrictive framework, we wondered whether the efficiency gain of  
163 synaptic caching can be transferred to multi-layer networks. Therefore we implement a multi-layer  
164 network trained with back-propagation. Back-propagation networks learn the associations of  
165 patterns by approaching the minimum of the error function through stochastic gradient descent.  
166 We use a network with one hidden layer with by default 100 units to classify hand-written digits  
167 from the MNIST dataset. As we train the network, we intermittently interrupt the learning to  
168 measure the energy consumed for plasticity and measure the performance on a held-out test-set.  
169 This yields a curve relating energy to accuracy.

170 Similar to a perceptron, learning without synaptic caching is metabolically expensive in  
171 a back-propagation network. Until reaching maximal accuracy, energy rises approximately

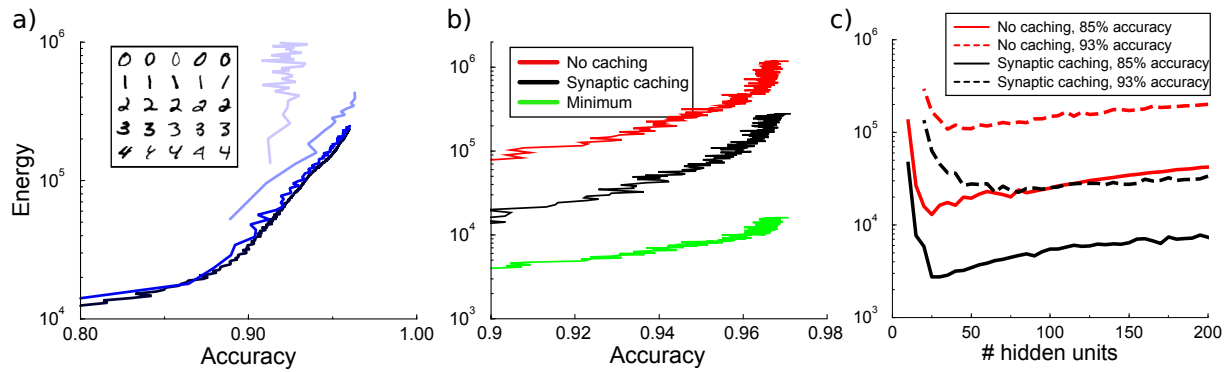

Figure 4: **Energy cost to train a multi-layer back-propagation network to classify digits from the MNIST data set** (a) Energy rises with the accuracy of identifying the digits from a held-out test data. Except for the larger learning rates, the energy is independent of the learning rate (from bottom to top learning rate  $\eta = 10^{-3}, 10^{-2}, 10^{-1}, 0.5$ ). Inset shows some MNIST examples. (b) Comparison of energy required to train the network with/without synaptic caching, and the minimal energy. As for the perceptron and depending on the cost of transient plasticity, synaptic caching can reduce energy need manifold. (c) The impact of number of hidden units in the network with back-propagation on the metabolic cost. The network is trained to classify digits from the MNIST dataset to 85% and 93% accuracy. Both with and without synaptic caching, energy needs are high when the number of hidden units is barely sufficient. Parameters for transient plasticity in (b) and (c):  $\tau = 1000, c = 0.001$ .

172 exponentially with accuracy, after which additional energy do not lead to further improvement.  
 173 When the learning rate is sufficiently small, the metabolic cost of plasticity is independent of the  
 174 learning rate. At larger learning rates, learning no longer converges and energy goes up steeply  
 175 without an increase in accuracy, Fig. 4A. With the exception of these large rates, these results  
 176 show that changing the learning rate does not save energy.

177 Similar to the perceptron, we evaluate how much energy would be required to directly set  
 178 the synaptic weights to their final values. Traditional learning without synaptic caching is once  
 179 again energetically inefficient, expending at least  $\sim 20$  times more energy compared to this  
 180 theoretical minimum whatever the desired accuracy level is, Fig. 4B. However, by splitting the  
 181 weights into persistent synaptic weights and transient synaptic caching weights, the network  
 182 can save substantial amounts of energy. As for the perceptron, depending on the decay and the  
 183 maintenance cost the energy ranges from as little as the minimum to as much as the energy  
 184 required without caching. Thus the efficiency gain of synaptic caching found for the perceptron  
 185 carries over to multi-layer networks.

186 It might seem that smaller networks would be metabolically less costly, because small networks  
 187 simply contain fewer synapses to modify. On the other hand, for the perceptron metabolic  
 188 costs rise rapidly when cramming many patterns into it. We wondered therefore how energy  
 189 cost depends on network size in the multi-layer network. Since the number of input units is  
 190 fixed to the image size and the number of output units equals the ten output categories, we  
 191 adjust the number of hidden units. As expected, higher accuracies require more hidden units  
 192 and energy, Fig. 4C. The network fails to reach the desired accuracy if the number of hidden  
 193 units is too small. When the network size is barely above the minimum requirement, the network



194 has to compensate the lack of hidden units with longer training time and hence a larger energy  
195 expenditure. However, very large networks also require more energy. These results show that  
196 from an energy perspective there exists an optimal number of neurons to participate in memory  
197 formation.

## 198 Discussion

199 Experiments on formation of a long-term memory of a single association suggest that synaptic  
200 plasticity is an energetically expensive process. We have shown that energy requirements  
201 rise steeply as memory load or designated accuracy level increase. This indicates trade-offs  
202 between energy consumption, and network capacity and performance. To improve efficiency  
203 we have proposed an algorithm named synaptic caching: temporarily storing changes in the  
204 synaptic strength at the transient forms of plasticity, which are, determined by a threshold, only  
205 occasionally consolidated to the persistent forms. Depending on the characteristics (decay and  
206 maintenance cost) of transient plasticity, this can lead to large energy savings in the energy  
207 required for synaptic plasticity. Further savings might be possible by adjusting the consolidation  
208 threshold as learning progresses and by being pathway-specific [25].

209 The implementation of a consolidation threshold is similar to what has been observed in  
210 physiology, in particular in the synaptic tagging and capture literature [26]. Our results thus  
211 give a novel interpretation of those findings. Synaptic consolidation is known to be affected  
212 by reward, novelty and punishment [26], which is compatible with a metabolic perspective as  
213 energy is expended only when the stimulus is worth remembering. In addition, our results for  
214 instance explain why consolidation is competitive, but transient plasticity is less so [27], namely  
215 the formation of long-term memory is precious. Consistent with this, there is evidence that  
216 encouraging consolidation increases energy consumption [12]. We also predict that the transient  
217 weight changes act as an accumulative threshold for consolidation. That is, sufficient transient  
218 plasticity should trigger consolidation, even in the absence of other consolidation triggers. Future  
219 characterization of the energy budget of synaptic plasticity should allow more precise predictions  
220 of our theory.

221 Combining persistent and transient storage mechanisms is a strategy well known in traditional  
222 computer systems to provide a faster and often energetically cheaper access to memory. In  
223 computer systems permanent storage of memories typically requires transmission of all information  
224 across multiple transient cache systems until reaching a long-term storage device and the transfer  
225 of information can often be a bottleneck in computer architectures and consumes considerable  
226 power in modern computers [28]. However, in the nervous system transient and persistent  
227 synapses appear to exist next to each other. The consolidation of information in a synapse does  
228 not require moving that information. Using this setup, biology appears to have found a more  
229 efficient way to store information.

230 Memory stability has long fascinated researchers [29], and in some cases forgetting can be  
231 beneficial [30]. Here we argue that the main benefit of more transient forms of plasticity is to  
232 permit the network to explore the weight space to find a desirable weight configuration using  
233 less energy. Besides suggesting forms of plasticity with different persistence, the cost of synaptic  
234 plasticity could potentially have influenced other aspects of neurobiological design. In principle,

235 homeostasis and long-term stability could impact the cost of learning as well. Moreover, this work  
236 focuses on just the metabolic cost of synaptic plasticity, but the brain also expends significant  
237 amounts of energy on spiking, synaptic transmission, and maintaining resting potential. Further  
238 study is needed to understand how this impacts total energy cost during and after learning.

## 239 Methods

### 240 Energy efficiency of the perceptron

241 For perceptron we can calculate the energy efficiency of both the classical perceptron and the  
242 gain achieved by synaptic caching. We first consider the case that transient plasticity does not  
243 decay, as this allows important theoretical simplifications. In the perceptron learning to classify  
244 binary patterns Eq. 7, the weight updates are either  $+\eta$  or  $-\eta$ , where  $\eta$  is the learning rate, so  
245 that the energy spent Eq. 1 per update per synapse equals  $\eta$ . Hence the total energy spent to  
246 classify all patterns  $M_{\text{perc}} = NK\eta$ , where  $K$  is the total number of updates. We find numerically  
247 that  $K = 2P/(2 - P/N)^2$ .

248 To calculate the efficiency we compare this to the minimal energy necessary to reach the  
249 final weight vector in the perceptron. We approximate the weight trajectory followed by the  
250 perceptron algorithm by a random walk. After  $K$  updates of step-size  $\eta$  the weights approximate  
251 a Gaussian distribution with zero mean and variance  $K\eta^2$ . In simulations the variance in the  
252 weights is about 20% smaller, likely reflecting correlations in the learning process not captured in  
253 the random walk approximation. By short-cutting the random walk, the minimal energy required  
254 to reach the weight vector is  $M_{\text{min}} = N\langle|w_i|\rangle = \sqrt{\frac{2}{\pi}}\eta N\sqrt{K}$ . Hence, we find for the inefficiency  
255 (see Fig. 1D)

$$\frac{M_{\text{perc}}}{M_{\text{min}}} = \frac{\sqrt{\pi P}}{2 - P/N}$$

### 256 Efficiency of synaptic caching

257 To calculate the efficiency gained with synaptic caching we need to calculate both the consolidation  
258 energy and the maintenance energy. The consolidation energy equals the number of consolidation  
259 events times the size of the updates. The size of the weight updates is equal to the consolidation  
260 threshold  $\theta$ , while the number of consolidation events follows from a random walk argument as  
261  $NK(\lceil\theta/\eta\rceil)^2$ . The ceiling function expresses the fact that when the threshold is smaller than  
262 learning rate, consolidation will always occur; we temporarily ignore this scenario. In addition,  
263 at the end of learning all remaining transient plasticity is consolidated, which requires an energy  
264  $N\langle|s_i(T)|\rangle$ . Assuming that the probability distribution  $P(s)$  has reached steady state, it has a  
265 triangular shape (see below) and  $\langle|s_i(T)|\rangle = \frac{1}{3}\theta$  so that the total consolidation energy

$$M_{\text{cons}} = \eta^2 \frac{NK}{\theta} + \frac{1}{3}N\theta$$

266 The transient energy is (again assuming that  $P(s)$  has reached steady state)

$$M_{\text{trans}} = cNT\theta/3$$

267 where  $T$  is the number of time-steps required for learning. Using that  $T = \frac{P^{3/2}}{(2-P/N)^2}$ , the total  
 268 energy when using synaptic caching is  $M_{\text{cache}} = M_{\text{cons}} + M_{\text{trans}} = N \left[ \eta^2 K / \theta + \frac{1}{3} \theta (1 + cT) \right]$ . The  
 269 optimal threshold  $\hat{\theta}$  is given by  $\frac{d}{d\theta} [M_{\text{cons}} + M_{\text{trans}}] = 0$  or

$$\hat{\theta}^2 = \eta^2 \frac{3K}{1 + cT}$$

270 at which the energy is  $M_{\text{cache}} = 2\eta N \sqrt{K} \sqrt{1 + cT} / \sqrt{3}$ . And so the efficiency of synaptic caching  
 271 is  $\frac{M_{\text{cache}}}{M_{\text{min}}} = \sqrt{\frac{2\pi}{3}} \sqrt{1 + cT}$ . However, as consolidation can maximally occur only once per time-step,  
 272  $M_{\text{cons}}$  cannot exceed  $M_{\text{perc}}$  so that the inefficiency is

$$\frac{M_{\text{cache}}}{M_{\text{min}}} = \min \left( \sqrt{\frac{2\pi}{3}} (1 + cT), \sqrt{\frac{\pi}{2}} K \right)$$

273 This equation reasonably matches the simulations, Fig. 2C (labeled 'theory').

## 274 Decaying transient plasticity

275 When transient plasticity decays, the situation is more complicated as the learning time depends  
 276 on the strength of the decay and to our knowledge no analytical expression exists for it. However,  
 277 it is still possible to estimate the power, i.e. the energy per time unit, for both the transient  
 278 component, denoted  $m_{\text{trans}}$ , and the consolidation component,  $m_{\text{cons}}$ . Under the random walk  
 279 approximation every time the perceptron output does not match the desired output, the transient  
 280 weight  $s_i$  is updated with an amount  $\Delta s_i$  drawn from a distribution  $Q$ , with zero mean and  
 281 variance  $\sigma^2$ . Given the update probability  $p$ , i.e. the fraction of patterns not yet classified  
 282 correctly, one has  $Q_s(\eta) = Q_s(-\eta) = p/2$  and  $Q_s(0) = 1 - p$ , so that  $\sigma_s^2 = p\eta^2$ . We assume that  
 283 the number of updates slowly decreases as learning progresses, hence  $p$  is quasi-stationary.

284 Every time-step  $\Delta t = 1$  the transient weights decay with a time-constant  $\tau$ . The synapse is  
 285 consolidated and  $s_i$  is reset to zero whenever the absolute value of the caching weight  $|s_i|$  exceeds  
 286  $\theta$ . Given  $p$  and  $\tau$ , we would like to know: 1) how often consolidation events occur which gives  
 287 consolidation power and 2) the maintenance power  $m_{\text{trans}} = cN \langle |s_i| \rangle$ . This problem is similar to  
 288 the random walk to threshold model used for integrate-and-fire neurons, but here there are two  
 289 thresholds:  $\theta$  and  $-\theta$ .

290 Under the assumptions of small updates and a smooth resulting distribution, the evolution  
 291 of the probability distribution  $P(s_i)$  is described by the Fokker-Planck equation, which in the  
 292 steady state gives

$$0 = -\frac{1}{\tau} \frac{\partial}{\partial s_i} [s_i P(s_i)] + \frac{1}{2} \sigma_s^2 \frac{\partial^2}{\partial s_i^2} P(s_i) + r \delta(s_i)$$

293 The last term is a source term that describes the re-insertion of weights by the reset process. The  
 294 boundary conditions are  $P(s_i = \pm\theta) = 0$ . While  $P(s_i)$  is continuous in  $s_i$ , the source introduces  
 295 a cusp in  $P(s_i)$  at the reset value. Conservation of probability ensures that  $r$  equals the outgoing  
 296 flux at the boundaries. One finds

$$P(s_i) = \frac{1}{Z} \exp \left[ -\frac{s_i^2}{\sigma^2} \right] \left[ \operatorname{erfi} \left( \frac{|s_i|}{\sigma} \right) - \operatorname{erfi} \left( \frac{\theta}{\sigma} \right) \right]$$

where  $\operatorname{erfi}(x) = -i\operatorname{erf}(ix)$ ,  $\sigma^2 = \frac{\tau}{\Delta t}\sigma_s^2$  and with normalization factor

$$Z = \frac{2\theta^2}{\sqrt{\pi}\sigma} {}_2F_2\left(1, 1; \frac{3}{2}, 2; -\left(\frac{\theta}{\sigma}\right)^2\right) - \sqrt{\pi}\sigma\operatorname{erf}\left(\frac{\theta}{\sigma}\right)\operatorname{erfi}\left(\frac{\theta}{\sigma}\right)$$

where  ${}_2F_2$  is the generalized hypergeometric function. In the limit of no decay this becomes a triangular distribution  $P(s_i) = [\theta - |s_i|]/\theta^2$ .

We obtain maintenance power

$$m_{\text{trans}} = cN\langle |s_i| \rangle \quad (4)$$

$$= \frac{cN}{Z} \left[ \frac{2\theta\sigma}{\sqrt{\pi}} - \sigma^2\operatorname{erfi}\left(\frac{\theta}{\sigma}\right) \right] \quad (5)$$

For small  $\theta/\sigma$ , i.e. small decay, this is linear in  $\theta$ ,  $m_{\text{trans}} \approx \frac{cN\theta}{3}$ . It saturates for large  $\theta$  because then the decay dominates and the threshold is hardly ever reached.

The consolidation rate follows from Fick's law

$$\begin{aligned} r &= \frac{1}{2}\sigma^2 P'(-\theta) - \frac{1}{2}\sigma^2 P'(\theta) \\ &= \frac{-2\sigma}{Z\sqrt{\pi}} \end{aligned}$$

The consolidation power is

$$m_{\text{cons}} = N\theta r \quad (6)$$

In the limit of no decay one has  $r = \sigma^2/\theta^2$ , so that  $m_{\text{cons}} = pN\eta^2/\theta$ . Strictly speaking this approximates learning with a random walk process and assumes local consolidation, Fig. 3A. However, Eqs. 5 and 6 give a good prediction of the simulation when provided with the time-varying update probability from the simulation, Fig. 5.

## Simulations

### Perceptron

Unless stated otherwise, we use a perceptron with  $N = 1000$  input units to classify  $P = N$  random binary ( $\pm 1$  with equal probability) input patterns  $\mathbf{x}^{(p)}$ , each to be associated to a randomly assigned desired binary output  $d^{(p)}$ . Each input unit is connected with a weight  $w_i$  signifying the strength of the connection. An 'always-on' bias unit with corresponding weight is included to adjust the threshold of the perceptron. The perceptron output  $y$  of a pattern is determined by the Heaviside step function  $\Theta$ ,  $y = \Theta(\mathbf{w}\cdot\mathbf{x})$ . If for a given pattern  $p$ , the output does not match the desired pattern output,  $\mathbf{w}$  is adjusted according to

$$\Delta w_i = \eta \left( d^{(p)} - y^{(p)} \right) x_i^{(p)} \quad (7)$$

where the learning rate  $\eta$  can be set to one without loss of generality. The perceptron algorithm cycles through all patterns until classified correctly. In principle the magnitude of the weight vector, and hence the minimal energy, can be arbitrarily small for a noise-free binary perceptron. However, this paradox is resolved as soon as robustness to any post-synaptic noise is required.

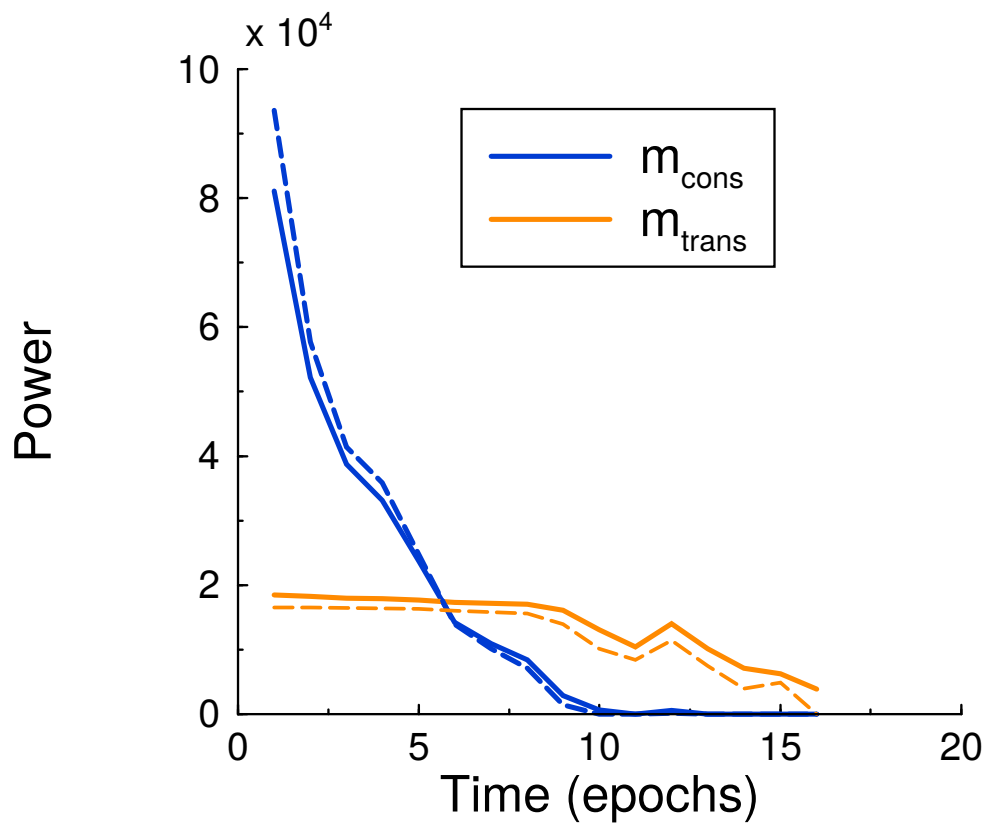

Figure 5: **Maintenance and consolidation power.** Power (energy per epoch) of the perceptron vs epoch. Solid curves are from simulation, dashed curves are the theoretical predictions, Eqs. 5 and 6, with their  $\sigma$  calculated by using the perceptron update rate  $p$  extracted from the simulation. Both powers are well described by the theory. Parameters:  $\tau = 500$ ,  $c = 0.01$ ,  $\theta = 5$ .

## 319 **Multi-layer networks**

320 For the multi-layer networks trained on MNIST, we use networks with one hidden layer, logistic  
321 units, and one-hot encoding at the output. Weights are updated according to the mean squared  
322 error back-propagation rule without regularization.

## 323 **Acknowledgments**

324 This project is supported by the Leverhulme Trust with grant number RPG-2017-404. MvR is  
325 supported by Engineering and Physical Sciences Research Council (EPSRC) grant EP/R030952/1.  
326 We would like to thank Joao Sacramento and Simon Laughlin for discussion and inputs.

## 327 **Author contribution**

328 MvR designed the experiment. HLL and MvR did the simulations and calculations, and co-wrote  
329 the paper.

## 330 **Competing financial interests**

331 The author declares no competing financial interests.

## **References**

- [1] Attwell, D., Laughlin, S. B. (2001) An energy budget for signaling in the grey matter of the brain. *J. Cereb. Blood Flow Metab.* 21(10):1133–1145.
- [2] Harris, J. J., Jolivet, R., Attwell, D. (2012) Synaptic energy use and supply. *Neuron* 75(5):762–777.
- [3] Levy, W. B., Baxter, R. A. (1996) Energy efficient neural codes. *Neural Comput.* 8(3):531–543.
- [4] Lennie, P. (2003) The cost of cortical computation. *Curr. Biol.* 13(6):493–497.
- [5] Alle, H., Roth, A., Geiger, J. R. P. (2009) Energy-efficient action potentials in hippocampal mossy fibers. *Science* 325(5946):1405–1408.
- [6] Fohlmeister, J. F. (2009) A nerve model of greatly increased energy-efficiency and encoding flexibility over the hodgkin–huxley model. *Brain Res.* 1296:225–233.
- [7] Levy, W. B., Baxter, R. A. (2002) Energy-efficient neuronal computation via quantal synaptic failures. *J. Neurosci.* 22(11):4746–4755.
- [8] Sacramento, J., Wichert, A., van Rossum, M. C. W. (2015) Energy efficient sparse connectivity from imbalanced synaptic plasticity rules. *PLoS Comput Biol* 11(6):e1004265.
- [9] Mery, F., Kawecki, T. J. (2005) A cost of long-term memory in drosophila. *Science* 308(5725):1148.

- [10] Plaçais, P.-Y., Preat, T. (2013) To favor survival under food shortage, the brain disables costly memory. *Science* 339(6118):440–442.
- [11] Jaumann, S., Scudelari, R., Naug, D. (2013) Energetic cost of learning and memory can cause cognitive impairment in honeybees. *Biol. Lett.* 9(4):20130149.
- [12] Plaçais, P.-Y., et al. (2017) Upregulated energy metabolism in the drosophila mushroom body is the trigger for long-term memory. *Nat. Commun.* 8(15510).
- [13] Rosenblatt, F. (1962) *Principles of neurodynamics: perceptrons and the theory of brain mechanisms*. (Spartan Books).
- [14] Hafner, A.-S., Donlin-Asp, P. G., Leitch, B., Herzog, E., Schuman, E. M. (2019) Local protein synthesis is a ubiquitous feature of neuronal pre- and postsynaptic compartments. *Science* 364(6441):eaau3644.
- [15] Gardner, E. J. (1987) Maxium storage capaiity in neural network models. *Europhys. Lett.* 4:481–485.
- [16] Oppen, M. (1988) Learning times of neural networks: Exact solution for a perceptron algorithm. *Phys. Rev. A* 38(7):3824–3826.
- [17] Brunel, N., Hakim, V., Isope, P., Nadal, J.-P., Barbour, B. (2004) Optimal information storage and the distribution of synaptic weights: perceptron versus Purkinje cell. *Neuron* 43(5):745–757.
- [18] Brunel, N. (2016) Is cortical connectivity optimized for storing information? *Nat. Neurosci.* 19(5).
- [19] Potter, W. B., et al. (2010) Metabolic regulation of neuronal plasticity by the energy sensor AMPK. *PLoS one* 5(2):e8996.
- [20] Padamsey, Z., Emptage, N. (2014) Two sides to long-term potentiation: a view towards reconciliation. *Philosophical Transactions of the Royal Society B: Biological Sciences* 369(1633):20130154.
- [21] Costa, R. P., Froemke, R. C., Sjöström, P. J., van Rossum, M. C. W. (2015) Unified pre- and postsynaptic long-term plasticity enables reliable and flexible learning. *eLife* 4:e09457.
- [22] Frey, U., Morris, R. G. (1997) Synaptic tagging and long-term potentiation. *Nature* 385(6616):533–536.
- [23] Barrett, A. B., Billings, G. O., Morris, R. G. M., van Rossum, M. C. W. (2009) State based model of long-term potentiation and synaptic tagging and capture. *PLoS Comput. Biol.* 5(1):e1000259.
- [24] Sajikumar, S., Navakkode, S., Sacktor, T. C., Frey, J. U. (2005) Synaptic tagging and cross-tagging: the role of protein kinase Mzeta in maintaining long-term potentiation but not long-term depression. *J. Neurosci.* 25(24):5750–5756.

- [25] Leibold, C., Monsalve-Mercado, M. M. (2016) Asymmetry of neuronal combinatorial codes arises from minimizing synaptic weight change. *Neural Comput.* 28(8):1527–52.
- [26] Redondo, R. L., Morris, R. G. M. (2011) Making memories last: the synaptic tagging and capture hypothesis. *Nat. Rev. Neurosci.* 12(1):17–30.
- [27] Sajikumara, S., Morris, R. G. M., Korte, M. (2014) Competition between recently potentiated synaptic inputs reveals a winner-take-all phase of synaptic tagging and capture. *Proc. Natl. Acad. Sci. U.S.A.* 111(33):12217–12221.
- [28] Kestor, G., Gioiosa, R., Kerbyson, D. J., Hoisie, A. (2013) Quantifying the energy cost of data movement in scientific applications. *IEEE International Symposium on Workload Characterization (IISWC)* pp. 56–65.
- [29] Richards, B. A., Frankland, P. W. (2017) The persistence and transience of memory. *Neuron* 94(6):1071–1084.
- [30] Brea, J., Urbanczik, R., Senn, W. (2014) A normative theory of forgetting: lessons from the fruit fly. *PLoS Comput. Biol.* 10(6):e1003640.
